# Supplementary material
Source: publisher site journal article supplement (https://www.dovepress.com/article/223760)
Supplement: Supplementary file 1 [file get_supplementary_file.php]

# Supplementary Materials

Table S1. aNSCLC-related health care resource utilization per 2L+ (overall, by histology and by country)

| **Resource** | **Mean (SD) per patient-month** | | | | | | | | | |
| --- | --- | --- | --- | --- | --- | --- | --- | --- | --- | --- |
| **Overall  (N = 973)** | **By Histology** | | **By Country** | | | | | | |
| **NSQ  (n = 514)** | **SQ (n = 459)** | **France  (n = 191)** | **Germany  (n = 225)** | **Italy  (n = 220)** | **Spain  (n = 199)** | **England (n = 52)** | **Netherlands**  **(n = 57)** | **Sweden**  **(n = 29)** |
| Hospitalization, length of stay in days | 0.8 (0.8) | 0.9 (0.9) | 0.7 (0.7) | 0.7 (0.5) | 0.7 (0.6) | 0.8 (0.7) | 0.8 (0.8) | 0.9 (1.0) | 0.6 (0.5) | 1.0 (1.3) |
| ED visits | 0.1 (0.1) | 0.1 (0.1) | 0.1 (0.1) | 0.1 (<0.0) | 0.1 (0.1) | 0.1 (0.1) | 0.1 (0.1) | 0.1 (0.1) | 0.1 (0.1) | 0.1 (<0.0) |
| Biomarker testing | 0.1 (0.1) | 0.1 (0.1) | 0.1 (0.1) | 0.1 (0.1) | 0.1 (0.1) | 0.1 (0.1) | 0.1 (0.1) | 0.1 (0.1) | 0.1 (0.1) | 0.1 (<0.0) |
| Diagnostic proceduresa | 0.1 (<0.0) | 0.1 (0.0) | 0.1 (<0.0) | 0.1 (<0.0) | 0.1 (<0.0) | 0.1 (<0.0) | 0.1 (<0.0) | . | 0.1 (<0.0) | 0.1 (<0.0) |
| Surgery | 0.0 (<0.0) | 0.0 (<0.0) | 0.0 (<0.0) | 0.0 (<0.0) | 0.0 (<0.0) | 0.1 (.) | 0.1 (.) | 0.0 (<0.0) | . | . |
| Radiotherapy | 0.1 (0.1) | 0.1 (0.1) | 0.1 (<0.0) | 0.1 (0.1) | 0.0 (<0.0) | 0.1 (<0.0) | 0.1 (<0.0) | 0.1 (0.1) | 0.1 (<0.0) | 0.1 (0.1) |
| Referrals | 0.1 (0.1) | 0.1 (0.1) | 0.1 (<0.0) | 0.1 (<0.0) | 0.1 (<0.0) | 0.1 (0.2) | 0.1 (<0.0) | 0.1 (0.1) | 0.1 (0.1) | 0.0 (<0.0) |
| Ancillary services ins daysb | 2.4 (2.5) | 2.5 (3.0) | 2.3 (1.9) | 2.8 (3.0) | 1.6 (1.4) | 2.1 (1.8) | 3.4 (4.0) | 0.7 (0.8) | 3.7 (2.3) | 2.6 (2.0) |

**Notes:** aPost-diagnosis; b.Ancillary services include nursing homes, hospices, and rehabilitation centres.

Abbreviations: 2L+, two or more lines of systemic treatment

Table S2. Weighted Average Unit Costs, and of Unit Costs by Country (Inflated to 2018 EUR)

| **Resource Use Item** | **Unit Cost in 2018 Euro** | | | | | | | **Weighted Average Across Countries** | **Unit Cost Source***  (1) England; (2) France; (3) Germany; (4) Italy; (5) The Netherlands; (6) Spain; (7) Sweden |
| --- | --- | --- | --- | --- | --- | --- | --- | --- | --- |
| **England**  **(n = 52)** | **France**  **(n = 191)** | **Germany**  **(n = 225)** | **Italy**  **(n = 220)** | **Netherlands**  **(n = 57)** | **Spain**  **(n = 199)** | **Sweden**  **(n = 29)** |
| ARMS test | N/A | N/A | N/A | N/A | 529 | N/A | N/A | 529 | (5) Nederlandse zorgautoriteit (NZA) 2015 |
| Assisted living facility per day | 153 | 83 | 59 | 97 | 226 | 270 | 381 | 135 | (1) Personal Social Service Research Unit (PSSRU) 2014; (2) Touchon et al.24; (3) DESTATIS 2011; (4) DESTATIS 2011, adjusted for price difference between Germany and Italy for home health care; (5) Zorginstituut Nederland (ZN) Kostenhandeleiding (ZNK) 2015; (6) Expert opinion (EO); (7) Södra Regionvårdsnämnden (SRVN) 2015 |
| Blood sample | N/A | N/A | N/A | 6 | N/A | N/A | N/A | 6 | (4) Agenas 2014 |
| Bone scintigraphy | 8,270 | 174 | 88 | 135 | 294 | 86 | 89 | 127 | (1) NHS reference costs (RC) 2013/14; (2) Aide au Codage (AAC) 2014; (3) EBM 2014; (4) Agenas 2014; (5) NZA 2015; (6) Diario Oficial de la Generalitat de Catalunya 2007 (4932); (7) EBM 2014 adjusted |
| Brachytherapy | N/A | 3,104 | N/A | N/A | N/A | N/A | N/A | 3,104 | (2) Tarifs Hospitalier 2014 |
| Bronchoscopy | 853 | 635 | 103 | 89 | 218 | 113 | 356 | 260 | (1) NHS RC 2013/14; (2) ENC 2013; (3) EBM 2014; (4) Agenas 2014; (5) NZA 2015; (6) Diario Oficial de Castilla la Mancha 2012 (180); (7) SVRN 2015 |
| Chest X-ray | 82 | 22 | 9 | 18 | 150 | 26 | 36 | 30 | (1) NHS RC 2013/14; (2) Classification Commune des Actes Médicaux (CCAM) 2014; (3) EBM 2014; (4) Agenas 2014; (5) Kostenhandeleiding 2015; (6) Diario Oficial de la Comunitat Valenciana (DOCV) 2008 (5922); (7) SVRN 2013 |
| Core needle biopsy | 44 | 0 | 26 | 17 | 108 | 139 | 212 | 53 | (1) NICE 201125; (2) EO; (3) GOÄ 2014; (4) Agenas 2014; (5) NZA 2015; (6) DOCV 2008 (5922); (7) SRVN Labmedicin Pathology Region Skåne 2015 |
| CT Scan | 128 | 129 | 70 | 151 | 150 | 219 | 170 | 141 | 1) NHS RC 2013/14; (2) CCAM 2014; (3) EBM 2014; (4) Agenas 2014; (5) ZNK 2015; (6) DOGC 2007 (4932); (7) SVRN 2013 |
| Direct sequencing | 77 | 77 | 77 | 77 | 3,965 | 77 | 696 | 324 | (1-4, 6) UCL Institute of Neurology 2015; (5) NZA 2015; (7) SRVN Labmedicin Genetik Region Skåne 2015 |
| Emergency department visit | 319 | 48 | 21 | 21 | 267 | 131 | 253 | 86 | (1) PSSRU 2014; (2) Améli 2014; (3) EBM 2014; (4) Agenas 2014; (5) ZNK 2015; (6) EO; (7) SRVN 2015 |
| Fine needle aspiration biopsy | 121 | 121 | 121 | 121 | 109 | 121 | 121 | 116 | (1-6) NHS University Plymouth Hospitals Private Healthcare Tariff 2011; (7) SRVN 2015 |
| FISH test | 81 | 81 | 81 | 81 | 468 | 81 | 477 | 324 | (1-4, 6) NHS Doncaster and Bassetlaw Hospitals 2007; (5) NZA 2015; (7) SRVN Labmedicin Genetik Region Skåne 2015 |
| Home health care per day | 68 | 83 | 46 | 81 | 226 | 65 | 381 | 87 | (1) PSSRU 2014; (2) Touchon et al.24; (3) DESTATIS 2011; (4) Ministero della Salute 2006; (5) ZNK 2015; (6) DOGC 2009; (7) SRVN 2015 |
| Hospice per day | 283 | 276 | 249 | 271 | 266 | 271 | 802 | 283 | (1) PSSRU 2014; (2) Johnston et al.26; (3) Deutscher Hospiz- und PalliativVerband eV 2011; (4) Ministero della Salute 2006; (5) ZNK 2010; (6) EO; (7) SRVN 2015 |
| Hospital bed day | 248 | 380 | 707 | 429 | 657 | 420 | 580 | 490 | (1) PSSRU 2014; (2) Maroun et al.27 combined with ATIH exDG 2013 and ATIH ex-OQN 2013; (3) WiDo data; (4) Tarife regionale della Regione Emilia Romana 2014; (5) ZNK 2015; (6) Mayordomo 201428; (7) SRVN 2015 |
| HRMA | 181 | 181 | 181 | 181 | 314 | 181 | 314 | 193 | (1-4, 6) NICE 2013 (Diagnostic guidance 9); (5, 7) EO |
| Immunohisto-chemistry | 111 | 111 | 111 | 111 | 468 | 111 | 314 | 138 | (1-4, 6) Southampton University Hospital NHS Trust; (5) ZNK 2015; (7) EO |
| Lobectomy | 7,853 | 770 | 441 | 770 | 2,993 | 770 | 11,705 | 1,528 | (1) NICE 2013 (Diagnostic guidance 9); (2, 4) AAC 2014; (3) GOÄ 2014; (5) NZA 2015; 7) NordDRG Slutenvård 2015 |
| Lymph node biopsy | 352 | 352 | 352 | 352 | 109 | 352 | 988 | 357 | (1-4, 6) NHS RC 2013/14; (5) NZA 2015; (7) SRVN 2015 |
| Mediastinoscopy | 837 | 837 | 837 | 837 | 837 | 203 | 672 | 703 | (1-5) NHS RC 2013/14; (6) Cernuda 199829; (7) SRVN 2015 |
| MRI brain | 181 | 201 | 129 | 300 | 262 | 169 | 269 | 204 | (1) NHS RC 2013/14; (2) CCAM 2014; (3) EBM 2014; (4) Agenas 2014; (5) NZA 2015; (6) DOCV 2002; (7) SRVN 2015 |
| MRI thorax | 181 | 201 | 129 | 234 | 236 | 153 | 267 | 185 | (1) NHS RC 2013/14; (2) CCAM 2014; (3) EBM 2014; (4) Agenas 2014; (5) ZNK 2015; (6) DOCV 2002; (7) SRVN 2015 |
| Mutant-enriched PCR | 278 | 278 | 278 | 278 | 278 | 278 | 278 | 278 | (1-7) SRVN Labmedicin Genetik Region Skåne 2015 |
| Needle aspiration/ core biopsy | 150 | 150 | 150 | 150 | 150 | 150 | 150 | 150 | (1-7) NZA 2015 |
| Nursing home day | 124 | 83 | 92 | 151 | 173 | 272 | 169 | 149 | (1) PSSRU 2014; (2) Touchon et al.24; (3) DESTATIS 2011; (4) DESTATIS 2011, adjusted for price difference between Germany and Italy for home health care; (5) ZNK 2015; (6) EO, (7) Jedenius et al. 201530 |
| PET scan | 4,449 | 1,406 | 458 | 824 | 1,212 | 1,407 | 1,761 | 1,217 | (1) NHS RC 2013/14; (2) HAS 2005; (3) GOÄ 2014; (4) Orlachio et al. 201431; (5) NZA 2015; (6) EO; (7) SRVN 2014 |
| Pneumonectomy | 11,114 | 804 | 441 | 804 | 4,337 | 804 | 15,858 | 1,927 | (1) NHS University Hospitals of Leicester 2012; (2,4,6) AAC 2014; (3) GOÄ 2014; (5) NordDRG Slutenvård |
| Radiotherapy | 160 | 12,143 | 5,091 | 363 | 5,913 | 5,013 | 4,892 | 5,169 | (1) NHS RC 2013/14; (2) Tarifs Hospitalier 2014; (3) G-DRG 2013; (4) Gazzetta Ufficiale (8) 2013; (5) Radiotherapiegroup 2015; (6) EO; (7) NordDRG Öppenvård 2015 |
| Real-time PCR | 256 | 256 | 256 | 256 | 552 | 256 | 552 | 282 | (1-4, 6) UCL Institute of Neurology London 2015; (5, 7) Labmedicin Genetik Region Skåne 2015 |
| Rehabilitation facility per day | 800 | 83 | 131 | 128 | 380 | 272 | 694 | 217 | (1) PSRRU 2014; (2) Touchon et al.24; (3, 4) Sonnenbergklinik 2014; (5) ZNK 2010; (6) EO; (7) SRVN 2015 |
| Skin excision | 363 | 804 | 441 | 804 | 3,407 | 804 | 313 | 835 | (1) NHS RC 2013/14; (2, 4, 6) AAC 2014; (3) GOÄ 2014; (5) NZA 2015; (7) NordDRG Öppenvård |
| Sputum analysis | 19 | 42 | 8 | 8 | 3 | 21 | 8 | 17 | (1) Moncayo et al. 201332; (2) NABM 2014; (3, 7) EBM 2014; (4) Agenas 2014; (5) NZA 2015; (6) EO |
| Thoracentesis | 827 | 408 | 49 | 191 | 53 | 61 | 161 | 199 | (1) NHS RC 2013/14; (2) CCAM 2014; (3) GOÄ 2014; (4) Agenas 2014; (5) NZA 2015; (6) Average of DOCV 2002 and LexNavarra 2010 (882); (7) SRVN 2015 |
| Thoracoscopy | 5,092 | 217 | 89 | 163 | 569 | 202 | 161 | 452 | (1) NHS RC 2013/14; (2) CCAM 2014; (3) GOÄ 2014; (4) Average of 2, 3 and 6; (5) Bijlage 2 bij Beleidsregel CU-2015 Tarieflijst Instellingen 2011; (6) DOCV 2008 (5922); (7) SRVN 2015 |
| Thoracotomy | 11,171 | 408 | 156 | 410 | 4,337 | 680 | 161 | 1,204 | (1) NHS RC 2013/14; (2) Thoracentesis CCAM 2014; (3) EBM 2014; (4) Average of 2, 3 and 6; (5) NZA 2015; (6) DOCV 2008 (5922); (7) SRVN 2015 |
| Visit (Pulmonologist or oncologist) | 120 | 29 | 55 | 24 | 118 | 113 | 101 | 63 | (1) PSSRU 2014; (2) Direct Mutuelle 2014; (3) Average of 2, 4, and 7; (4) Mencacci et al. 201333; (5) NZA 2015; (6) DOGC 2009; (7) SRVN 2015 |
| Wedge/segment removal | 11,114 | 978 | 562 | 978 | 2,993 | 978 | 11,705 | 1,861 | (1) NHS University Hospitals of Leicester 2012; (2, 4, 6) AAC 2014; (3) GOÄ 2014; (5) NZA 2015; (7) NordDRG Slutenvård 2015 |
| **Drug costs per mg** | | | | | | | | | |
| Bevacizumab | 2.75 | 2.60 | 4.41 | 0.78 | 3.51 | 3.29 | 2.75 | 2.81 | (1, 7) British National Formulary (BNF) 2015; (2) Base UCD 2014; (3) Rote Liste 2014; (4) AIFA 2014; (5) ZN 2015; (6) Colegio de Farmaceuticas de Ponteverde (CFP) 2016 |
| Carboplatin | 0.40 | 0.04 | 0.61 | 0.27 | 0.35 | 0.16 | 0.46 | 0.30 | (1) BNF 2015; (2) Base UCD 2014; (3) Rote Liste 2014; (4) AIFA 2014; (5) ZN 2015; (6) CFP 2016; (7) Tandvårds- och läkemedelsförmånsverket (TLV) 2015 |
| Cisplatin | 0.58 | 0.06 | 0.98 | 0.24 | 0.51 | 0.23 | 0.41 | 0.41 | (1) BNF 2015; (2) Thériaque 2014; (3) Rote Liste 2014; (4) AIFA 2014; (5) ZN 2015; (6) CFP 2016; (7) TLV 2015 |
| Docetaxel | 7.66 | 3.48 | 10.20 | 2.28 | 6.27 | 2.27 | 8.73 | 5.06 | (1) BNF 2015; (2) Base UCD 2014; (3) Rote Liste 2014; (4) AIFA 2014; (5) ZN 2015; (6) CFP 2016; (7) TLV 2015 |
| Etoposid | 0.14 | 0.02 | 0.53 | 0.06 | 0.18 | 0.10 | 0.25 | 0.19 | (1) BNF 2015; (2) Thériaque 2014; (3) Rote Liste 2014; (4) AIFA 2014; (5) ZN 2015; (6) CFP 2016; (7) TLV 2015 |
| Gemcitabine | 0.17 | 0.11 | 0.25 | 0.07 | 0.09 | 0.05 | 0.17 | 0.12 | (1, 7) BNF 2015; (2) Base UCD 2014; (3) Rote Liste 2014; (4) AIFA 2014; (5) ZN 2015; (6) CFP 2016 |
| Paclitaxel | 2.39 | 1.59 | 4.89 | 2.6 | 2.84 | 1.36 | 0.38 | 2.62 | (1) BNF 2015; (2) Base UCD 2014; (3) Rote Liste 2014; (4) AIFA 2014; (5) ZN 2015; (6) CFP 2016; (7) TLV 2015 |
| Pemetrexed | 1.19 | 2.17 | 5.31 | 2.82 | 3.08 | 2.48 | 1.19 | 3.08 | (1, 7) BNF 2015; (2) Base UCD 2014; (3) Rote Liste 2014; (4) AIFA 2014; (5) ZN 2015; (6) CFP 2016 |
| Streptozocin | 0.14 | 0.14 | 0.14 | 0.14 | 0.14 | 0.14 | 0.14 | 0.14 | (1-7 BioMol 2014 |
| Vinorelbine | 3.31 | 2.18 | 3.9 | 1.25 | 2.68 | 0.65 | 2.57 | 2.16 | (1) BNF 2015; (2) Base UCD 2014; (3) Rote Liste 2014; (4) AIFA 2014; (5) ZN 2015; (6) CFP 2016; (7) TLV 2015 |
| Capecitabin | <0.01 | <0.01 | <0.01 | <0.01 | <0.01 | <0.01 | <0.01 | <0.01 | (1) BNF 2015; (2, 4) Base UCD 2014; (3) Rote Liste 2014; (5) ZN 2015; (6) CFP 2016; (7) TLV 2015 |
| Afitinib | 1.72 | 1.32 | 2.42 | 1.34 | 1.83 | 1.83 | 1.34 | 1.73 | (1) BNF 2015; (2, 4, 7) TLV 2015; (3) Rote Liste 2014; (5, 6) ZN 2015 |
| Methotrexate | 0.06 | 0.02 | 0.14 | 0.02 | 0.07 | 0.02 | 0.05 | 0.05 | (1) BNF 2015; (2, 4, 6) Thériaque 2014; (3) Rote Liste 2014; (5) ZN 2015; (7) TLV 2015 |
| Crizotinib | 0.37 | 0.40 | 0.51 | 0.40 | 0.39 | 0.36 | 0.31 | 0.41 | (1) BNF 2015; (2, 4) Thériaque 2014; (3) Rote Liste 2014; (5) ZN 2015; (6) CFP 2016; (7) TLV 2015 |
| Erlotinib | 0.43 | 0.51 | 0.67 | 0.43 | 0.54 | 0.47 | 0.47 | 0.52 | (1) BNF 2015; (2) Thériaque 2014; (3) Rote Liste 2014; (4) AIFA 2014; (5) ZN 2015; (6) CFP 2016; (7) TLV 2015 |
| Gefitinib | 0.34 | 0.32 | 0.48 | 0.33 | 0.37 | 0.28 | 0.29 | 0.36 | (1) BNF 2015; (2) Thériaque 2014; (3) Rote Liste 2014; (4) AIFA 2014; (5) ZN 2015; (6) CFP 2016; (7) TLV 2015 |
| 5-Fluoruracil | 0.01 | 3.79 | 0.01 | <0.01 | 0.01 | <0.01 | 0.01 | 0.75 | (1, 5, 7) ZN 2015; (2) Base UCD 2014; (3) Rote Liste 2014; (4) AIFA 2014; (6) CFP 2016 |
| Cetuximab | 2.44 | 1.84 | 3.04 | 3.04 | 2.44 | 2.58 | 2.44 | 2.62 | (1, 7) BNF 2015; (2) Thériaque 2014; (3) Rote Liste 2014; (4) AIFA 2014; (5) ZN 2015; (6) CFP 2016 |
| Osimertinib | 2.85 | 2.85 | 2.85 | 2.85 | 2.85 | 2.85 | 2.85 | 2.85 | (1) BNF 2017 |
| Sorafenib | 0.18 | 0.16 | 0.23 | 0.15 | 0.18 | 0.16 | 0.01 | 0.17 | (1) BNF 2015; (2) Base UCD 2014; (3) Rote Liste 2014; (4) AIFA 2014; (5) ZN 2015; (6) MSSSI 2015; (7) TLV 2015 |
| Topotecan | 58.60 | 64.49 | 82.84 | 64.77 | 58.6 | 21.09 | 83.13 | 59.81 | (1, 5) ZN 2015; (2) Base UCD 2014; (3) Rote Liste 2014; (4) AIFA 2014; (6) CFP 2016; (7) TLV 2015 |
| Temozolomide | 0.84 | 0.97 | 1.18 | 0.97 | 0.84 | 0.40 | 0.29 | 0.87 | (1, 5) ZN 2015; (2, 4) Base UCD 2014; (3) Rote Liste 2014; (6) CFP 2016; (7) TLV 2015 |

* All unit costs were inflated according to the country-specific harmonized indices of consumer prices (HICP)

**Abbreviations:** AAC, Aide du Codage; AIFA, Agenzia italiana del farmaco, ; ATIH, Agence technique de l'information sur l'hospitalisation; ARMS, Amplified refractory mutation system; Base UCD, Base d’unités communes de dispensation ; BNF, British National Formulary; CCAM, Classification Commune des Actes Médicaux; CFP, Colegio de Farmaceuticas de Ponteverde; CT, computed tomography; DESTATIS, Statistisches Bundesamt; DOCV, Diario Oficial de la Comunitat Valenciana; DOGC, Diario oficial de la generalitat de catalunya; DRG, Diagnosis Related Group; EBM, Einheitlicher Bewertungsmaßstab; ENC, Enquête nationale des coûts; EO, expert opinion; ex-DG, dotation globale; ex-OQN, objectif quantifié national; FISH, Fluorescent in situ hybridization;; GOÄ, Gebührenordnung für Ärzte; HAS, Haute Autorité de Santé; HRMA, High resolution melting analysis; MRI, magnetic resonance imaging; MSSSI, Ministerio de Sanidad, Consumo y Bienestar Social; N/A, Not available; NABM, Nomenclature des actes de biologie médicale; NHS, National Health Service; NICE, National Institute for Health and Care Excellence; NZA, Nederlandse zorgautoriteit; PCR, polymerase chain reaction; PET, positron emission tomography; PSSRU, Personal Social Service Research Unit; RC, reference costs; SRVN, Södra Regionvårdsnämnden; TLV, Tandvårds- och läkemedelsförmånsverket; UCL, University College London; WiDo, Wissenschaftliches Institut der AOK; ZN, Zorginstituut Nederland; ZNK, Zorginstituut Nederland Kostenhandeleiding.
